# Supplementary material
Source: PubMed Central journal article supplement (PMC4785817)
Supplement: shar027951.ww2_default.pdf [file shar027951.ww2_default.pdf]

**Supplementary Data B: Trial characteristics of the included 70 RCTs**

| S. No. | Drug for I | Ind. | Age (years) | Trial           | Dose of I mg/day | No. in I arm             | Active C | No. in C arm | Dose of C mg/day | No. in PLB arm | Study R duration (weeks) | Coding dictionary used | Trial phase | Any psycho active or sedative medications permitted | Excluded patients with suicidal risk |
|--------|------------|------|-------------|-----------------|------------------|--------------------------|----------|--------------|------------------|----------------|--------------------------|------------------------|-------------|-----------------------------------------------------|--------------------------------------|
| 1.     | duloxetine | MDD  | 18-65       | HMAQa           | 20 to 60         | 70                       | FLX      | 33           | 20               | 70             | 8                        | COSTART                | 2           | Y                                                   | Y                                    |
| 2.     | duloxetine | MDD  | 18 to 65    | HMAQb           | 20 to 60         | 82                       | FLX      | 37           | 20               | 75             | 8                        | Not stated             | 2           | Y                                                   | Y                                    |
| 3.     | duloxetine | MDD  | at least 18 | HMAYa           | 40 or 60         | 188<br>40: 95<br>60: 93  | PAR      | 86           | 20               | 93             | 8                        | Not stated             | 3           | Y                                                   | Y                                    |
|        |            |      |             | HMAYa EXT/CONT* | 40 or 60         | 145<br>40: 70<br>60: 75  | PAR      | 70           | 20               | 58             | 26                       | Not stated             | 3           | Y                                                   | Y                                    |
| 4.     | duloxetine | MDD  | at least 18 | HMAyb (Acute)   | 40 or 60         | 196<br>40: 93<br>60: 103 | PAR      | 97           | 20               | 99             | 8                        | Not stated             | 3           | Y                                                   | Y                                    |
|        |            |      |             | HMAyb EXT/CONT* | 40 or 60         | 152<br>40: 71<br>60: 81  | PAR      | 70           | 20               | 71             | 26                       | Not stated             | 3           | Y                                                   | Y                                    |
| 5.     | duloxetine | MDD  | at least 18 | HMBHa           | 60               | 123                      | None     | NA           | NA               | 122            | 9                        | Not stated             | 3           | Y                                                   | Y                                    |
| 6.     | duloxetine | MDD  | at least 18 | HMBHb           | 60               | 128                      | None     | NA           | NA               | 139            | 9                        | Not stated             | 3           | Y                                                   | Y                                    |
| 7.     | duloxetine | MDD  | at least 18 | HMBC            | 60               | 533                      | None     | NA           | NA               | None           | 12                       | MedDRA                 | 3           | Y                                                   | Y                                    |
|        |            |      |             | HMBC EXT/CONT*  | 60               | 136                      | None     | NA           | NA               | 142            | 26                       | MedDRA                 | 3           | Y                                                   | Y                                    |
| 8.     | duloxetine | MDD  | at least 18 | HMATa           | 20 or 40         | 175<br>20: 91<br>40: 84  | PAR      | 89           | 20               | 90             | 8                        | Not stated             | 3           | Y                                                   | Y                                    |
| 9.     | duloxetine | MDD  | at least 18 | HMATb           | 20 or 40         | 177<br>20: 86<br>40: 91  | PAR      | 87           | 20               | 89             | 8                        | Not stated             | 3           | Y                                                   | Y                                    |
| 10.    | duloxetine | MDD  | 18 to 72    | HMAH            | 20 or 30         | 89                       | None     | NA           | NA               | 88             | 10                       | Not stated             | 2           | Y                                                   | Y                                    |
|        |            |      |             | HMAH EXT        | 20 or 30         | 23                       | None     | NA           | NA               | 23             | 44                       | Not stated             | 2           | Y                                                   | Y                                    |

| S. No. | Drug for I | Ind.                                           | Age (years) | Trial          | Dose of I mg/day | No. in I arm                         | Active C | No. in C arm | Dose of C mg/day | No. in PLB arm | Study R duration (weeks) | Coding dictionary used | Trial phase | Any psycho active or sedative medications permitted | Excluded patients with suicidal risk |
|--------|------------|------------------------------------------------|-------------|----------------|------------------|--------------------------------------|----------|--------------|------------------|----------------|--------------------------|------------------------|-------------|-----------------------------------------------------|--------------------------------------|
|        |            |                                                |             | /CONT*         |                  |                                      |          |              |                  |                |                          |                        |             |                                                     |                                      |
| 11.    | duloxetine | MDD                                            | at least 18 | HMAI           | 5, 10 or 20      | 390<br>5: 130<br>10: 129<br>20: 131  | CLO      | 132          | 150              | 126            | 8                        | Not stated             | 2           | Y                                                   | Y                                    |
|        |            |                                                |             | HMAI EXT/CONT* | 5, 10 or 20      | 185<br>5: 57<br>10: 71<br>20: 57     | CLO      | 64           | 150              | 59             | 44                       | Not stated             | 2           | Y                                                   | Y                                    |
| 12.    | duloxetine | MDD with short REM latency                     | 18 to 72    | HMAG           | 20               | 53                                   | None     | NA           | NA               | 52             | 12                       | Not stated             | 2           | Y                                                   | Y                                    |
| 13.    | duloxetine | SUI for Women                                  | at least 18 | SBAT           | 80               | 247                                  | None     | NA           | NA               | 247            | 12                       | MedDRA                 | 3           | N                                                   | N                                    |
| 14.    | duloxetine | SUI for Women                                  | 18 to 65    | SAAW           | 20, 40, or 80    | 415<br>20: 138<br>40: 137<br>80: 140 | None     | NA           | NA               | 138            | 12                       | MedDRA                 | 2           | N                                                   | N                                    |
| 15.    | duloxetine | SUI or mixed for Women                         | 18 to 80    | SAAB           | 20, 30, and 40   | 221<br>20: 75<br>30: 69<br>30/40: 77 | None     | NA           | NA               | 67             | 6                        | Not stated             | 2           | N                                                   | N                                    |
| 16.    | duloxetine | SUI or mixed for Women                         | at least 18 | SBAX           | 80               | 227                                  | None     | NA           | NA               | 231            | 12                       | MedDRA                 | 3           | N                                                   | N                                    |
| 17.    | duloxetine | SUI or mixed for Women                         | at least 18 | SBAV           | 80               | 344                                  | None     | NA           | NA               | 339            | 12                       | MedDRA                 | 3           | N                                                   | N                                    |
| 18.    | duloxetine | SUI for Women electing surgery for severe pure | ≥18 and ≤75 | SBAM           | 80 to 120        | 55                                   | None     | NA           | NA               | 54             | 8                        | MedDRA                 | 2           | N                                                   | N                                    |

| S. No. | Drug for I | Ind.                             | Age (years)                                    | Trial        | Dose of I mg/day                                            | No. in I arm                                                           | Active C    | No. in C arm | Dose of C mg/day | No. in PLB arm            | Study R duration (weeks) | Coding dictionary used | Trial phase | Any psycho active or sedative medications permitted | Excluded patients with suicidal risk |
|--------|------------|----------------------------------|------------------------------------------------|--------------|-------------------------------------------------------------|------------------------------------------------------------------------|-------------|--------------|------------------|---------------------------|--------------------------|------------------------|-------------|-----------------------------------------------------|--------------------------------------|
|        |            | GSI                              |                                                |              |                                                             |                                                                        |             |              |                  |                           |                          |                        |             |                                                     |                                      |
| 19.    | duloxetine | SUI, urge, or mixed              | 30 to 80                                       | SAAA         | 20                                                          | 55                                                                     | None        | NA           | NA               | 37                        | 3                        | Not stated             | 2           | N                                                   | N                                    |
| 20.    | duloxetine | SUI with Urinary Urgency and PDO | 18 to 85                                       | SAAH         | 30 or 40                                                    | 16                                                                     | None        | NA           | NA               | 16                        | 1                        | COSTART                | 2           | N                                                   | N                                    |
| 21.    | duloxetine | BPH in Men                       | 40 to 85                                       | SAAI         | 30 or 40                                                    | 47                                                                     | None        | NA           | NA               | 44                        | 4                        | COSTART                | 2           | N                                                   | N                                    |
| 22.    | duloxetine | FM with or without MDD           | at least 18                                    | HMBOa        | 60                                                          | 104<br>37 with MDD and 67 with No MDD                                  | None        | NA           | NA               | 103<br>42 MD and 61 no MD | 12                       | Not stated             | 2           | Y                                                   | Y                                    |
| 23.    | duloxetine | DPNP                             | at least 18                                    | HMAW         | 60BI<br>D <sup>1</sup><br>60Q<br>D <sup>2</sup><br>20Q<br>D | 342<br>60 <sup>1</sup> :<br>113<br>60 <sup>2</sup> :<br>114<br>20: 115 | None        | NA           | NA               | 115                       | 12                       | Not stated             | 2           | Y                                                   | N                                    |
| 24.    | fluoxetine | MDD                              | 8 to <18 (8 to <13 children 13<18 adolescents) | X065         | 20**                                                        | 48                                                                     | None        | NA           | NA               | 48                        | 8                        | COSTART                | 3           | N                                                   | N                                    |
| 25.    | fluoxetine | MDD                              | 8 to <18 (8 to <13 children 13<18 adolescents) | HCJE         | 20 to 60                                                    | 109                                                                    | None        | NA           | NA               | 110                       | 9                        | Not stated             | 3           | Y                                                   | Y                                    |
|        |            |                                  |                                                | HCJE<br>EXT/ | 20 to 60                                                    | FLX/                                                                   | FLX/<br>PLB | 20           | NA               | PLB/<br>PLB               | 42                       | Not stated             | 3           | Y                                                   | Y                                    |

| S. No. | Drug for I | Ind.             | Age (years)                                    | Trial   | Dose of I mg/day   | No. in I arm                      | Active C | No. in C arm | Dose of C mg/day | No. in PLB arm | Study R duration (weeks) | Coding dictionary used | Trial phase | Any psycho active or sedative medications permitted | Excluded patients with suicidal risk |
|--------|------------|------------------|------------------------------------------------|---------|--------------------|-----------------------------------|----------|--------------|------------------|----------------|--------------------------|------------------------|-------------|-----------------------------------------------------|--------------------------------------|
|        |            |                  |                                                | CONT*   |                    | FLX 20                            |          |              |                  | 40             |                          |                        |             |                                                     |                                      |
| 26.    | fluoxetine | OCD              | 7 to <18 (7 to <13 children 13<18 adolescents) | HCIJW   | 20 to 60           | 71                                | None     | NA           | NA               | 32             | 13                       | COSTART                | 3           | Y                                                   | Y                                    |
| 27.    | paroxetine | MDD              | 12 to 18 (18+11 months)                        | 329     | 20 to 40           | 93                                | IMI      | 95           | 50 to 300        | 87             | 8                        | ADECS                  | Not stated  | N                                                   | Y                                    |
| 28.    | paroxetine | MDD              | 13 to 18 (18+11 months)                        | 377     | 20 to 40           | 187                               | None     | NA           | NA               | 99             | 12                       | ADECS                  | Not stated  | N                                                   | Y                                    |
| 29.    | paroxetine | MDD              | 7 to 17                                        | 701     | 10 to 50           | 104                               | None     | NA           | NA               | 102            | 8                        | ADECS                  | Not stated  | N                                                   | Y                                    |
| 30.    | paroxetine | PTSD             | at least 18                                    | 627     | 20 to 50           | 160                               | None     | NA           | NA               | 162            | 12                       | ADECS                  | Not stated  | Y                                                   | Y                                    |
| 31.    | paroxetine | PTSD             | at least 18                                    | 648     | 20 to 50           | 151                               | None     | NA           | NA               | 156            | 12                       | ADECS                  | Not stated  | Y                                                   | Y                                    |
| 32.    | paroxetine | PTSD             | at least 18                                    | 651     | 20 or 40           | 365 20: 183 40: 182               | None     | NA           | NA               | 186            | 12                       | ADECS                  | Not stated  | Y                                                   | Y                                    |
| 33.    | paroxetine | SAD/SP           | 8 to 17                                        | 676     | 10 to 50           | 165                               | None     | NA           | NA               | 157            | 16                       | ADECS                  | Not stated  | N                                                   | Y                                    |
| 34.    | paroxetine | OCD              | 7 to 17                                        | 704     | 10 to 50           | 100                               | None     | NA           | NA               | 107            | 10                       | ADECS                  | Not stated  | N                                                   | Y                                    |
| 35.    | sertraline | MDD in hospitals | 18 to 65                                       | 050-101 | 50,100, 200 or 400 | 96 50: 26 100: 24 200: 23 400: 23 | None     | NA           | NA               | 26             | 4                        | Not stated             | Not stated  | Y                                                   | U                                    |
| 36.    | sertraline | MDD              | 18 to 65                                       | 050-103 | 50, 100            | 278 50: 95                        | None     | NA           | NA               | 91             | 6                        | Not stated             | 2/3         | Y                                                   | U                                    |

| S. No. | Drug for I | Ind.                               | Age (years)  | Trial       | Dose of I mg/day                | No. in I arm                                   | Active C | No. in C arm | Dose of C mg/day         | No. in PLB arm | Study R duration (weeks) | Coding dictionary used | Trial phase | Any psycho active or sedative medications permitted | Excluded patients with suicidal risk |
|--------|------------|------------------------------------|--------------|-------------|---------------------------------|------------------------------------------------|----------|--------------|--------------------------|----------------|--------------------------|------------------------|-------------|-----------------------------------------------------|--------------------------------------|
|        |            |                                    |              |             | or<br>200                       | 100: 92<br>200: 91                             |          |              |                          |                |                          |                        |             |                                                     |                                      |
| 37.    | sertraline | MDD                                | 18 to 65     | 050-104     | 50,<br>100,<br>or<br>200        | 149                                            | AMY      | 149          | 50,<br>100,<br>or<br>150 | 150            | 8                        | Not stated             | 2/3         | Y                                                   | N                                    |
| 38.    | sertraline | MDD                                | 18 to 65     | 050-310     | 50,<br>100,<br>200<br>or<br>400 | 151<br>50: 39<br>100: 36<br>200: 38<br>400: 38 | None     | NA           | NA                       | 37             | 4                        | Not stated             | Not stated  | Y                                                   | U                                    |
| 39.    | sertraline | MDD<br>or<br>bipolar<br>depression | 18 to 70     | 050-334     | 50 to<br>200                    | 129                                            | None     | NA           | NA                       | 129            | 6                        | Not stated             | Not stated  | N                                                   | Y                                    |
| 40.    | sertraline | MDD                                | 18 to 60     | 86CE21-0238 | 50,<br>100,<br>200<br>or<br>400 | 159                                            | None     | NA           | NA                       | 40             | 8                        | Not stated             | Not stated  | Y                                                   | Y                                    |
| 41.    | sertraline | MDD                                | 60 and above | 86CE21-0247 | 50 to<br>200                    | 43                                             | DES      | 45           | 25<br>to150              | 42             | 8                        | Not stated             | Not stated  | Y                                                   | Y                                    |
| 42.    | sertraline | MDD                                | 6 to 17      | A0501001    | 25 to<br>200                    | 97                                             | None     | NA           | NA                       | 91             | 10                       | WHO-ART                | 3           | Y                                                   | Y                                    |
| 43.    | sertraline | MDD                                | 6 to 17      | A0501017    | 25 to<br>200                    | 92                                             | None     | NA           | NA                       | 96             | 10                       | WHO-ART                | 3           | Y                                                   | Y                                    |
| 44.    | sertraline | PTSD                               | 18 or older  | 93CE21-0640 | 25 to<br>200                    | 100                                            | None     | NA           | NA                       | 108            | 12                       | WHO-ART                | 3           | Y                                                   | Y                                    |
| 45.    | sertraline | PTSD                               | 18 or older  | 93CE21-0641 | 25 to<br>200                    | 86                                             | None     | NA           | NA                       | 83             | 12                       | WHO-ART                | 3           | Y                                                   | Y                                    |
| 46.    | sertraline | PTSD                               | at least 18  | 95CE21-0671 | 25 to<br>200                    | 94                                             | None     | NA           | NA                       | 93             | 12                       | WHO-ART                | 3           | Y                                                   | Y                                    |
| 47.    | sertraline | PTSD                               | at least 18  | 96CE21-0682 | 25 to<br>200                    | 96                                             | None     | NA           | NA                       | 97             | 12                       | WHO-ART                | 3           | Y                                                   | Y                                    |

| S. No. | Drug for I | Ind. | Age (years) | Trial                               | Dose of I mg/d ay | No. in I arm                              | Active C | No. in C arm | Dose of C mg/day | No. in PLB arm     | Study R duration (weeks) | Coding dictionary used | Trial phase | Any psycho active or sedative medications permitted | Excluded patients with suicidal risk |
|--------|------------|------|-------------|-------------------------------------|-------------------|-------------------------------------------|----------|--------------|------------------|--------------------|--------------------------|------------------------|-------------|-----------------------------------------------------|--------------------------------------|
| 48.    | sertraline | GSP  | at least 18 | R-0601                              | 25 to 200         | 211                                       | None     | NA           | NA               | 204                | 12                       | WHO-ART                | 3           | Y                                                   | Y                                    |
| 49.    | sertraline | SP   | 18 to 60    | STL-NY-94-004                       | 50 to 200         | 135                                       | None     | NA           | NA               | 69                 | 20                       | Not stated             | 3           | N                                                   | Y                                    |
| 50.    | sertraline | OCD  | 16 to 75    | 050-336                             | 50 to 200         | 76                                        | None     | NA           | NA               | 78                 | 12                       | Not stated             | Not stated  | N                                                   | N                                    |
| 51.    | sertraline | OCD  | 18 or older | 86CE21-0237 & 86CE21-248            | 50 to 200         | 44                                        | None     | NA           | NA               | 43                 | 8                        | WHO-ART                | Not stated  | Y                                                   | U                                    |
| 52.    |            |      |             |                                     |                   |                                           |          |              |                  |                    |                          |                        |             |                                                     |                                      |
| 53.    | sertraline | OCD  | 18 or older | 88CE21-0371 & 88CE21-0372           | 50, 100 or 200    | 241 371:102 372: 139                      | None     | NA           | NA               | 84 371: 38 372: 46 | 12                       | WHO-ART                | Not stated  | Y                                                   | U                                    |
| 54.    |            |      |             |                                     |                   |                                           |          |              |                  |                    |                          |                        |             |                                                     |                                      |
|        |            |      |             | 88CE21-0371 & 88CE21-0372 EXT/CONT* | 50, 100 or 200    | 96 371: 40 372: 56 50: 33 100: 25 200: 38 | None     | NA           | NA               | 22 371: 9 372: 13  | 48                       | WHO-ART                | Not stated  | Y                                                   | U                                    |
| 55.    | sertraline | OCD  | 18 or older | 91CE21-0546                         | 50 to 200         | 86                                        | None     | NA           | NA               | 82                 | 12                       | WHO-ART                | Not stated  | Y                                                   | U                                    |
| 56.    | sertraline | OCD  | 6 to 17     | 90CE21-0498                         | 25, 50 or 200     | 94                                        | None     | NA           | NA               | 95                 | 12                       | WHO-ART                | Not stated  | N                                                   | N                                    |
| 57.    | sertraline | PD   | 18 or older | 90CE21-0514                         | 50, 100 or 200    | 119                                       | None     | NA           | NA               | 38                 | 12                       | WHO-ART                |             | Y                                                   | N                                    |
| 58.    | sertraline | PD   | 18 or older | 90CE21-0529                         | 50, 100 or 200    | 132                                       | None     | NA           | NA               | 45                 | 12                       | WHO-ART                | Not stated  | Y                                                   | N                                    |

| S. No. | Drug for I  | Ind.  | Age (years)                         | Trial                          | Dose of I mg/d ay          | No. in I arm | Active C | No. in C arm | Dose of C mg/day            | No. in PLB arm | Study R duration (weeks) | Coding dictionary used | Trial phase | Any psycho active or sedative medications permitted | Excluded patients with suicidal risk |
|--------|-------------|-------|-------------------------------------|--------------------------------|----------------------------|--------------|----------|--------------|-----------------------------|----------------|--------------------------|------------------------|-------------|-----------------------------------------------------|--------------------------------------|
| 59.    | sertraline  | PD    | 18 or older                         | 93CE21-0629                    | 25 to 200                  | 85           | None     | NA           | NA                          | 88             | 10                       | WHO-ART                | Not stated  | Y                                                   | Y                                    |
| 60.    | sertraline  | PD    | 18 or older                         | 93CE21-0630                    | 25 to 200                  | 88           | None     | NA           | NA                          | 90             | 10                       | WHO-ART                | Not stated  | Y                                                   | Y                                    |
| 61.    | sertraline  | PD    | 18 or older                         | 93CE21-0646                    | 25 to 100                  | 103          | None     | NA           | NA                          | 99             | 10                       | WHO-ART                | Not stated  | Y                                                   | Y                                    |
| 62.    | sertraline  | NIDDM | 18 to 70                            | 050-113                        | 50 to 200                  | 181          | None     | NA           | NA                          | 175            | 54                       | Not stated             | Not stated  | N                                                   | U                                    |
| 63.    | venlafaxine | MDD   | 18 or older                         | 600A-:302-US, CA/302           | 75 to 200                  | 72           | TRA      | 77           | 150 to 400 avg.: 294 to 300 | 76             | 6                        | Not stated             | 3           | Y                                                   | Y                                    |
|        |             |       |                                     | 600A-:302-US, CA/302 EXT/CONT* | 75 to 200                  | 37           | TRA      | 30           | 150 to 400 avg.: 294 to 300 | 29             | 67.6                     | Not stated             | 3           | Y                                                   | Y                                    |
| 64.    | venlafaxine | MDD   | 18 or legal age of consent or older | 0600A1-372-US                  | 200, 300 or 375            | 157          | FLX      | 158          | 40, 60 or 80                | 152            | 6                        | COSTART                | 3           | Y                                                   | Y                                    |
| 65.    | venlafaxine | MDD   | 18 to 65                            | 0600A-203-US                   | 25, 75, or 125             | 266          | None     | NA           | NA                          | 92             | 6                        | Not stated             | 2           | Y                                                   | U                                    |
|        |             |       |                                     |                                | 25 mg 89 75 mg 89 125mg 88 |              |          |              |                             |                |                          |                        |             |                                                     |                                      |
| 66.    | venlafaxine | MDD   | 18 or legal age of consent          | 600A-303-US                    | 75 to 225                  | 83           | IMI      | 82           | 75 to 225 avg.: 177         | 82             | 6                        | Not stated             | 3           | Y                                                   | Y                                    |

| S. No. | Drug for I                   | Ind. | Age (years)                         | Trial                 | Dose of I mg/d ay | No. in I arm                       | Active C | No. in C arm | Dose of C mg/day | No. in PLB arm | Study R duration (weeks) | Coding dictionary used | Trial phase | Any psycho active or sedative medications permitted | Excluded patients with suicidal risk |
|--------|------------------------------|------|-------------------------------------|-----------------------|-------------------|------------------------------------|----------|--------------|------------------|----------------|--------------------------|------------------------|-------------|-----------------------------------------------------|--------------------------------------|
|        |                              |      | or older                            |                       |                   |                                    |          |              | to185            |                |                          |                        |             |                                                     |                                      |
|        |                              |      |                                     | 600A-303-US EXT/CONT* | 75 to 225         | 33                                 | IMI      | 35           | 75 to 225        | 33             | 51.5                     | Not stated             | 3           | Y                                                   | Y                                    |
| 67.    | venlafaxine                  | MDD  | 18 to 65                            | 600A-313-US           | 25, 75 or 200     | 238<br>25: 80<br>75: 76<br>200: 82 | None     | NA           | NA               | 80             | 6                        | Not stated             | 3           | Y                                                   | Y                                    |
| 68.    | venlafaxine extended release | MDD  | 18 or legal age of consent or older | 0600B-209-US          | 75 to 225         | 100                                | None     | NA           | NA               | 104            | 8                        | Not stated             | 3           | Y                                                   | Y                                    |
| 69.    | venlafaxine extended release | MDD  | 18 or legal age of consent or older | 0600B-367-EU          | 75 or 150         | 167<br>75: 85<br>150: 82           | PAR      | 82           | 20               | 83             | 8                        | Not stated             | 3           | Y                                                   | Y                                    |
| 70.    | venlafaxine extended release | MDD  | 18 or legal age of consent or older | 0600B 1-384-US/EU/CA  | 150 to 375        | 180                                | IMI      | 187          | 50 to 200        | 68             | 6                        | Not stated             | 3           | Y                                                   | Y                                    |

Y: yes; N: no; U: unclear- no list of inclusion and exclusion criteria only summary information and no access to protocol for confirmation.  
I: intervention; C: comparator; PLB: placebo

BID: twice daily; QD: once daily

AMY: amitriptyline; CLO: clomipramine; DES: desipramine; IMI: imipramine; TRA: trazodone; V

BPH: Irritative Symptoms of Benign Prostatic Hyperplasia; diabetic peripheral neuropathic pain; FM: Fibromyalgia; GSI: genuine stress incontinence; GSP: generalized social phobia; MDD: major depressive disorder; NIDDM: patients with non-insulin-dependent diabetes mellitus for obesity; OCD: obsessive compulsive disorder; PD: panic disorder; DPNP: Painful Diabetic Neuropathy; PDO: Proven Detrusor Overactivity; PTSD: posttraumatic stress disorder; REM: short rapid eye movement ; SAD: social anxiety disorder; SP: social phobia; SUI: stress urinary incontinence



ADECS: Adverse Drug Experience; COSTART: Coding System Coding Symbols for a Thesaurus of Adverse Reaction Terms; MedDRA: Medical Dictionary for Regulatory Activities; WHO-ART: World Health Organization Adverse Drug Reaction Terminology

*\*denotes extension phase or continuation (EXT/ CONT) of trial;*

**\*\* notes that patients unable to tolerate fluoxetine could dose every other day instead of daily dosing in trial X065**
